# Supplementary material for: Promoterless Gene Targeting Approach Combined to CRISPR/Cas9 Efficiently Corrects Hemophilia B Phenotype in Neonatal Mice
Source: PubMed Central journal article supplement (PMC8962648; doi:10.3389/fgeed.2022.785698), 2022-03-11
Supplement: Table1.pdf [file Table1.pdf]

| <b>Target protein</b> | <b>Supplier</b>         | <b>Source</b> | <b>Dilution</b> |
|-----------------------|-------------------------|---------------|-----------------|
| eGFP                  | Santa Cruz              | Rabbit        | 1/3000          |
| GAPDH-HRP             | Sigma-Aldrich           | Mouse         | 1/10000         |
| hFIX                  | Affinity<br>Biologicals | Goat          | 1/3000          |

**Supplementary Table 1:** Primary and secondary antibodies used.
